# Supplementary material
Source: publisher site journal article supplement (https://www.dovepress.com/article/575836)
Supplement: Supplementary file 1 [file 575836%20Revised%20%20Supplemental%20materials_1.docx]

**Supplementary Materials**

**Supplementary Figure 1.** The social accountability questionnaire.


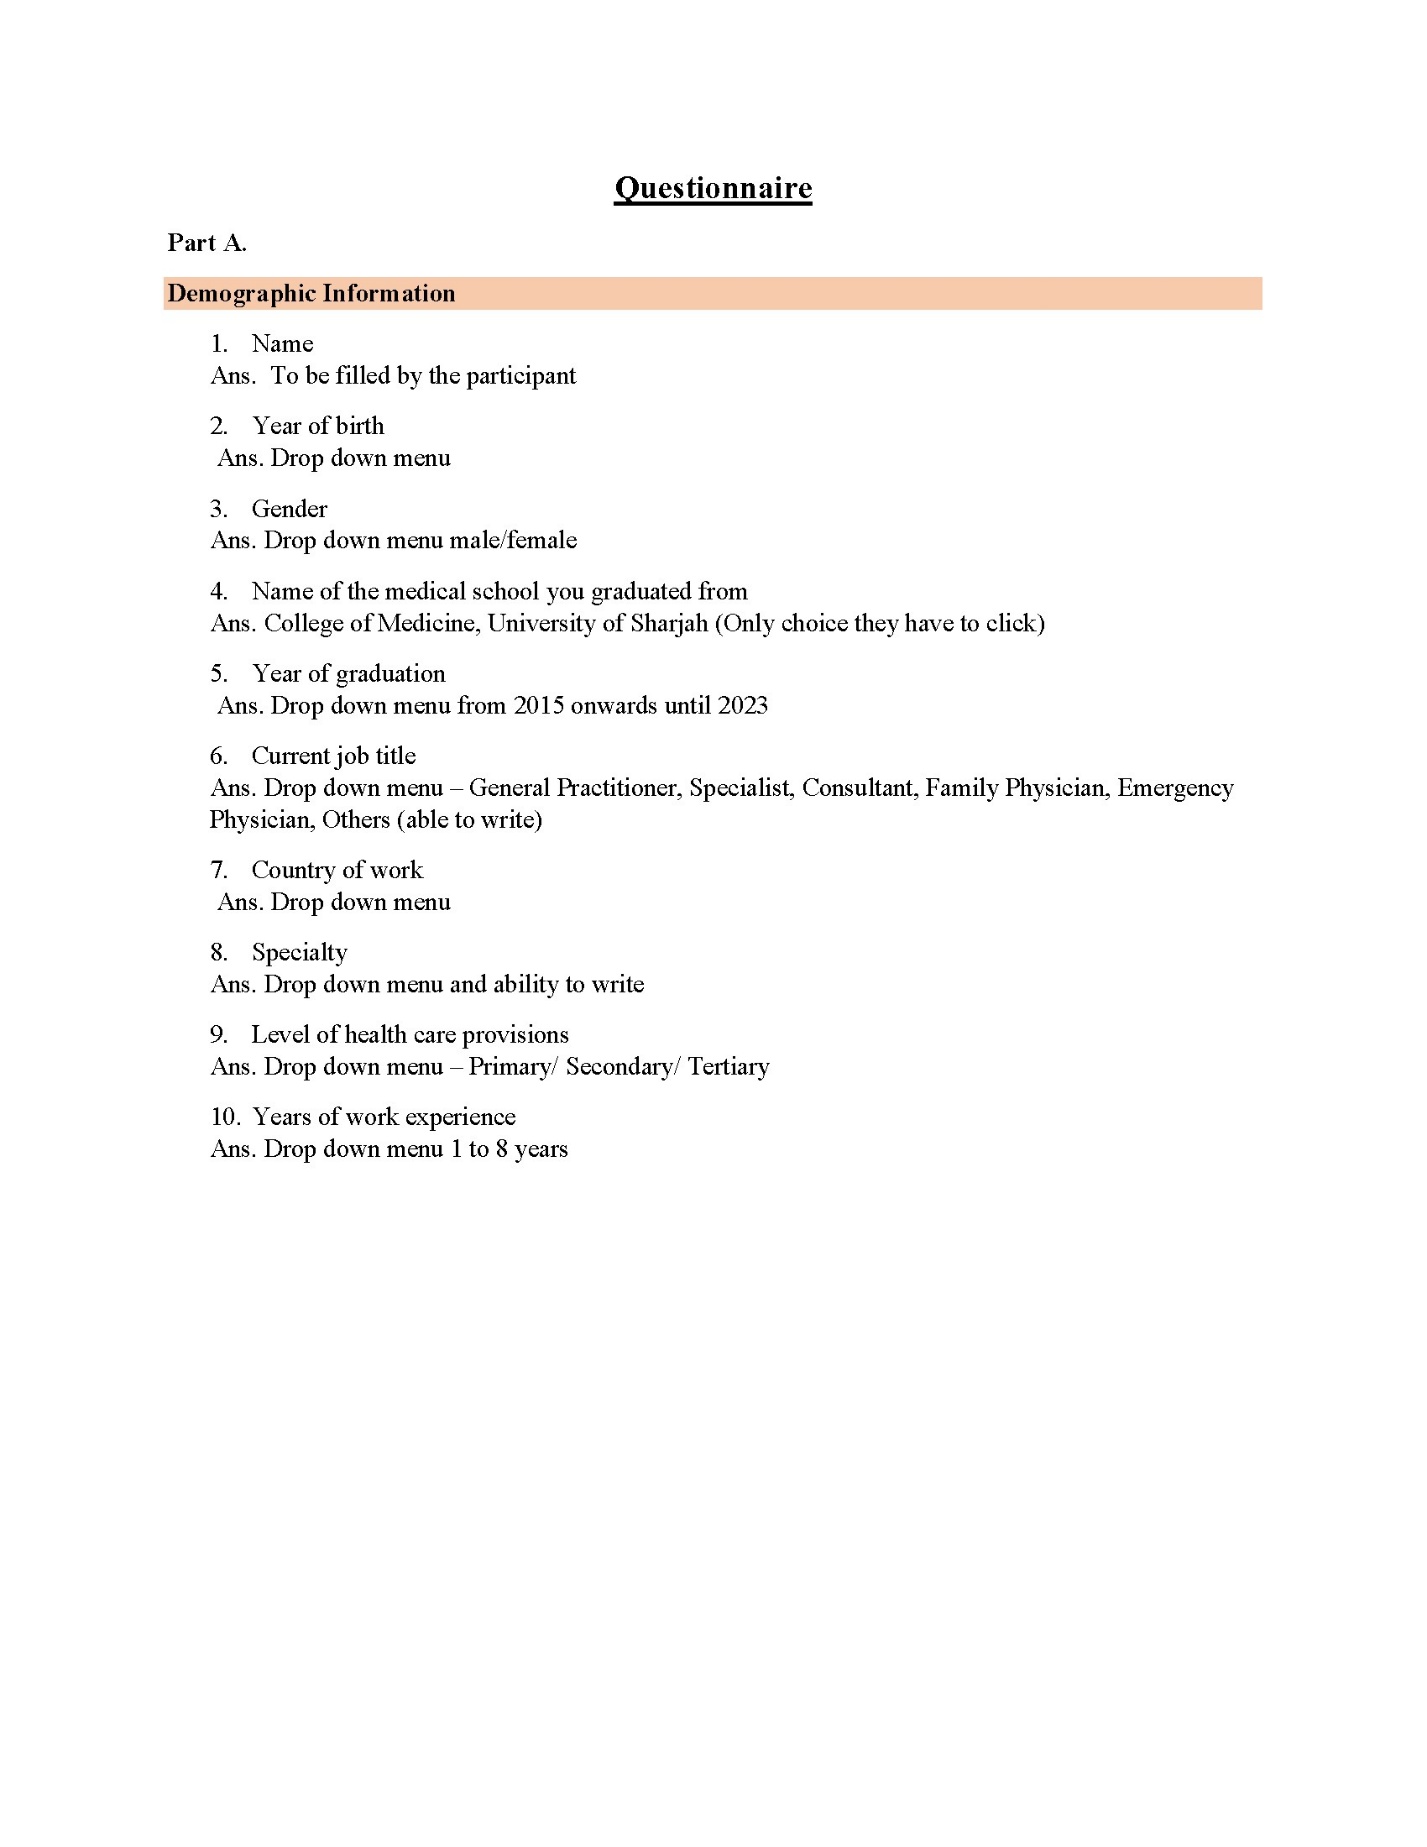


**Supplementary Table 1.** List of PBL cases used in undergraduate education in the college of medicine at University of Sharjah.

| **Year 1** | | |
| --- | --- | --- |
| **Unit Name** | **PBL Case Title** | **Topic/Theme** |
| Life Cycle | 1. A journey in the womb | Pregnancy |
| 1. Road map to health | Infancy and childhood |
| 1. It is all in the genes | Inborn error of metabolism |
| 1. A child with Down syndrome | Chromosomal abnormality |
| 1. Slippery path | Adolescence/drug use and abuse |
| 1. The twilight years | Old age and health issues |
|  |  |  |
| Man, and his Environment | 1. Nadia burns her hand | Acute inflammation and healing |
| 1. An unimmunized child | Immunity and immunization |
| 1. A viral infection | Virus / Microbes |
| 1. Ahmed’s frequent infections | Immunodeficiency and infections |
| 1. Pesticide poisoning caused toddler’s death | Acute poisoning/ toxicology |
| 1. A smoker with a chronic cough | Introduction to neoplasia/cancer |
|  |  |  |
| Musculoskeletal system | 1. Shoulder pain in an adult | Anatomy of joints |
| 1. Fracture of arm in a 62-year-old woman | Bone fracture |
| 1. 70-year-old woman with skin rash | Peripheral neuropathy |
| 1. Multiple painful swollen joints | Rheumatoid arthritis |
| 1. Taxi driver with back pain | Sciatica |
| 1. A woman with pain in bones and joints | Metabolic bone disorder/osteoporosis |
| 1. Boy with pain and swelling in his right thigh | Bone tumors |
| 1. Chronic pain in her left knee | Osteoarthritis |
| 1. Muscle weakness in a 5-year-old boy | Muscle diseases & Gene therapy |
|  |  |  |
| Hematopoietic system | 1. I always feel tired | Anemia/Hemoglobinopathies |
| 1. Palpable spleen | Leukemia/WBC disorders |
| 1. Rash in a kindergarten teacher | Platelet disorders |
|  | | |
| Year 2 | | |
| Cardiovascular and respiratory system | 1. Yellow spots below the eyes | Hypertension/hyperlipidemia |
| 1. Fainting while gardening | Valvular heart diseases |
| 1. A 70-year-old man collapses while standing | Arrythmias |
| 1. Heart attack | Myocardial infarction |
| 1. Swollen fits | Congestive heart failure |
| 1. Anna’s out of breath | Obstructive lung diseases |
| 1. A snoring patient | Obstructive Sleep Apnea |
| 1. Faisal has fever and cough | Respiratory tract infections/pneumonia |
| 1. Blood in her sputum | Lung cancer |
|  |  |  |
| Endocrine system | 1. Falling behind in growth | Hormonal abnormalities/growth hormone |
| 1. Losing weight | Thyroid diseases |
| 1. No more diets | Cushing’s syndrome |
|  |  |  |
| Gastrointestinal system | 1. Heart burn | Peptic ulcer/GERD |
| 1. A lot of fuss | Celiac disease |
| 1. I always feel tired and fatigued | Colorectal cancer/GI neoplasms |
| 1. Unhealthy eating habits | Obesity/Metabolic syndrome |
| 1. Yellow eyes | Hepatitis/Liver disorders |
| 1. Acute Abdomen | Pancreatitis |
|  |  |  |
| Renal and Reproductive | 1. Diabetic with acute swelling of hands and feet | Diabetic nephropathy/Nephrotic syndrome |
| 1. Ismail with RTA and shock | Acute renal failure/ Hypovolemia |
| 1. Blood in my urine | Bladder cancer |
| 1. Unable to pass urine | Prostate hypertrophy and prostatic diseases |
| 1. Two years & no baby | Infertility |
| 1. Bleeding after menopause | Cervical cancer |
|  |  |  |
| Year 3 | | |
| Neurosciences | 1. Walking with difficulty | Syringomyelia/ Spinal cord lesions |
| 1. A child with stiff neck | CNS infections/Meningitis |
| 1. Head injury | Head injury |
| 1. Recurrent seizures | Epilepsy |
| 1. Sudden onset of weakness | Stroke/Cardiovascular accidents |
| 1. Ahmed has tremors | Parkinson's disease |
| 1. Salem does not remember | Alzheimer’s disease |
| 1. Headaches | Brain tumors |
|  |  |  |
| Special senses and neuropsychiatry | 1. Blurred vision | Refractive errors of eye |
| 1. Hard hearing | Hearing impairment/ASOM and CSOM |
| 1. A Change in Mood | Depression |
| 1. Nasser has enemies | Schizophrenic disorders |
|  |  |  |
| Multisystem unit | 1. A 27-year-old woman with vaginal discharge | Sexually transmitted infections and reproductive health |
| 1. A 35-year-old man with fever and cough | Tuberculosis and chronic pulmonary infections |
| 1. Fever in a returning traveler | Malaria and other blood protozoa |
| 1. A 20-year-old woman with an ulcer | Skin disorders (benign and malignant) |
| 1. A 36-year-old lady with a lump in the breast | Breast tumors |
| 1. Fatima was brought confused | Diabetes |
| 1. A 63-year-old smoker with leg pain | Peripheral vascular diseases |
| 1. Salma with facial rash | Systemic lupus erythematous |
| 1. A 62-year-old man with neck swelling | Lymphoma |
| 1. A 60-year-old man with painful toe | Gout and other arthropathies |
|  |  |  |

**Appendix**

**Glossary**

1. Problem-Based Learning (PBL): A student-centered educational strategy in which learners acquire knowledge and skills by working collaboratively to solve complex, real-world problems.
2. Social Accountability: The obligation of medical schools to align education, research, and service activities with the priority health needs of the communities they serve.
3. Physician training refers to the structured process through which doctors are educated, trained, and assessed to become competent, independent medical practitioners.
4. Undergraduate medical education: provide foundational sciences, clinical skills, professionalism to obtain a degree in medicine (MBBS / MD).
5. Entrustable Professional Activities (EPAs): Units of professional practice that learners are entrusted to perform independently once sufficient competence is demonstrated through assessment.
6. Interprofessional Education (IPE): Learning activities in which students from different health professions learn with, from, and about each other to improve collaboration and patient care.
7. Team-Based Learning (TBL): An active learning strategy that emphasizes teamwork, accountability, and application of knowledge through structured group activities.
8. Case Method (CM): A learner-centered instructional approach that uses real or simulated clinical cases to promote critical thinking, ethical reasoning, and application of knowledge to practice.
9. Scaffolding: An instructional strategy that supports progressive learning by building on prior knowledge and gradually increasing task complexity and learner independence.
10. Social Determinants of Health: The social, economic, and environmental conditions that influence individual and population health outcomes.
